# Supplementary material for: Graphene-supported CoS2 particles: an efficient photocatalyst for selective hydrogenation of nitroaromatics in visible light
Source: Royal Society of Chemistry journal article supplement (doi:10.1039/c7cy00356k), 2017-01-01
Supplement: c7cy00356k1.pdf [file c7cy00356k1.pdf]

# Supporting Information

## Graphene-supported $\text{CoS}_2$ Particles: an Efficient Photocatalyst for Selective Hydrogenation of Nitroaromatics in Visible Light

Ben Ma,<sup>a,b</sup> Yingyong Wang,<sup>\*a</sup> Xili Tong,<sup>a</sup> Xiaoning Guo,<sup>a</sup> Zhanfeng Zheng<sup>a</sup> and Xiangyun Guo<sup>\*a</sup>

<sup>a</sup> State Key Laboratory of Coal Conversion, Institute of Coal Chemistry, Chinese Academy of Sciences, Taiyuan, 030001, China.

<sup>b</sup> University of the Chinese Academy of Sciences, Beijing 100039, China.

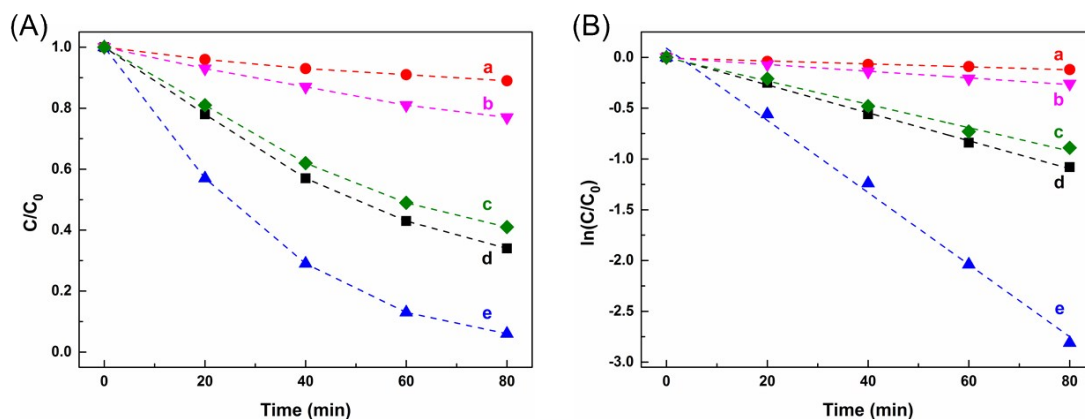

**Figure S1** Plots of  $C_t/C_0$  versus reaction time and  $\ln(C_t/C_0)$  versus reaction time for the catalytic reduction of nitrobenzene to aniline over  $\text{CoS}_2$  catalyst in the dark (a) and under light (d);  $\text{CoS}_2/\text{graphene}$  in the dark (b), under light (e) and using water as solvent under light (c).

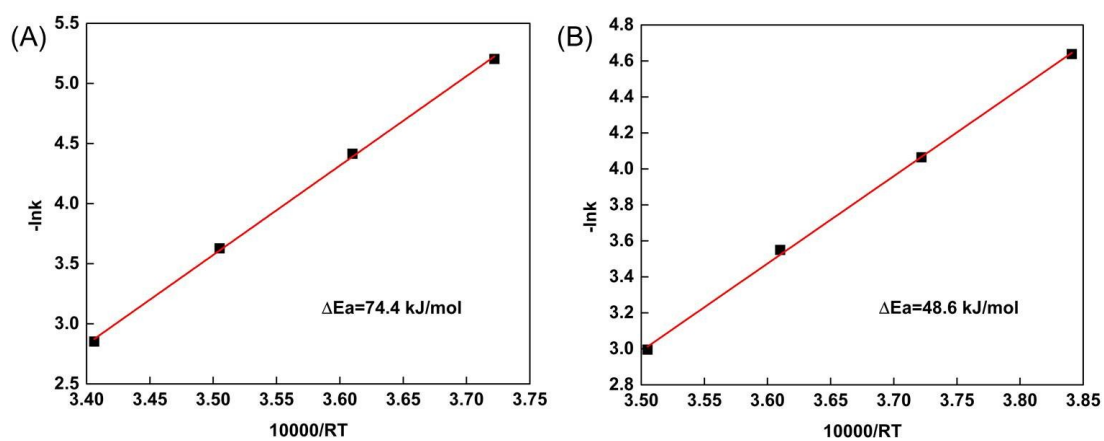

**Figure S2** The activation energy determinations of CoS<sub>2</sub> (A) and CoS<sub>2</sub>/graphene (B) under visible light based on the Arrhenius equation.

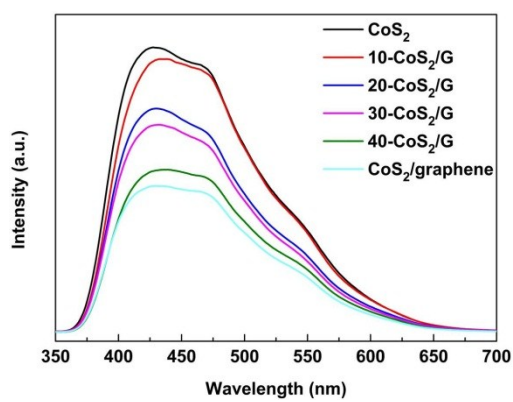

**Figure S3** Photoluminescence spectra of CoS<sub>2</sub>, 10-CoS<sub>2</sub>/G, 20-CoS<sub>2</sub>/G, 30-CoS<sub>2</sub>/G, 40-CoS<sub>2</sub>/G and CoS<sub>2</sub>/graphene (excitation wavelength, 280 nm).

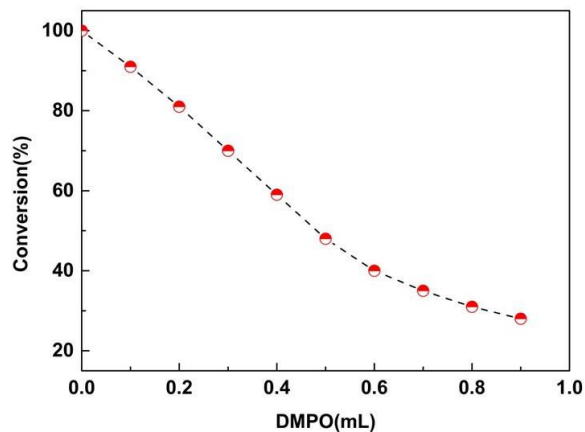

**Figure S4** Dependence of nitrobenzene conversion on the volume of DMPO.

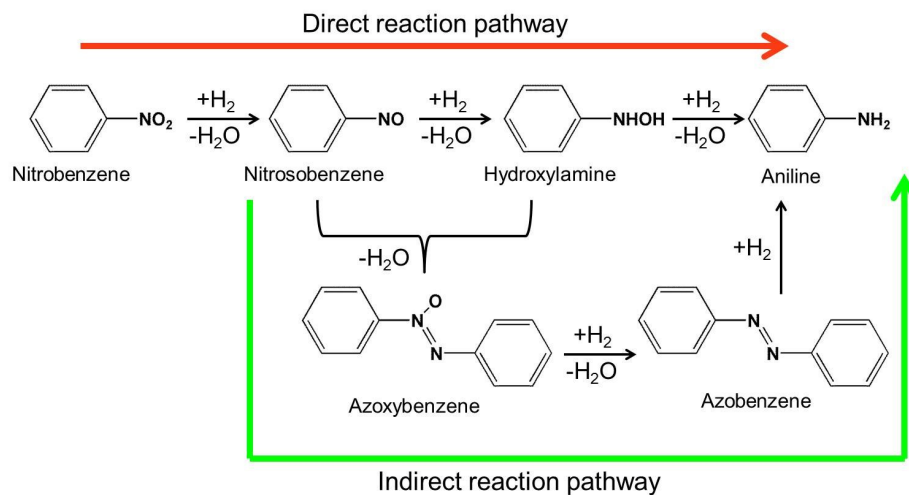

**Scheme S1** Proposed mechanism for nitrobenzene reduction.

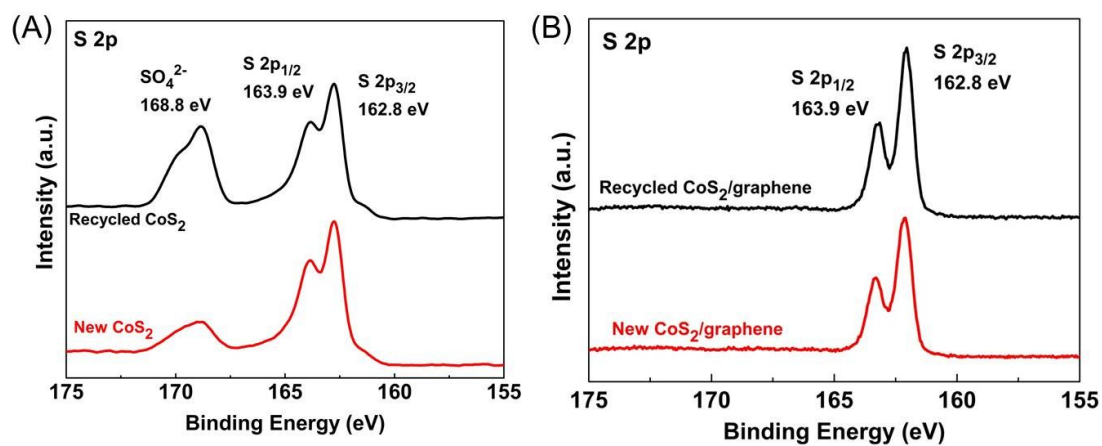

**Figure S5** XPS profiles of recycled and new CoS<sub>2</sub> (A), and recycled and new CoS<sub>2</sub>/graphene (B).

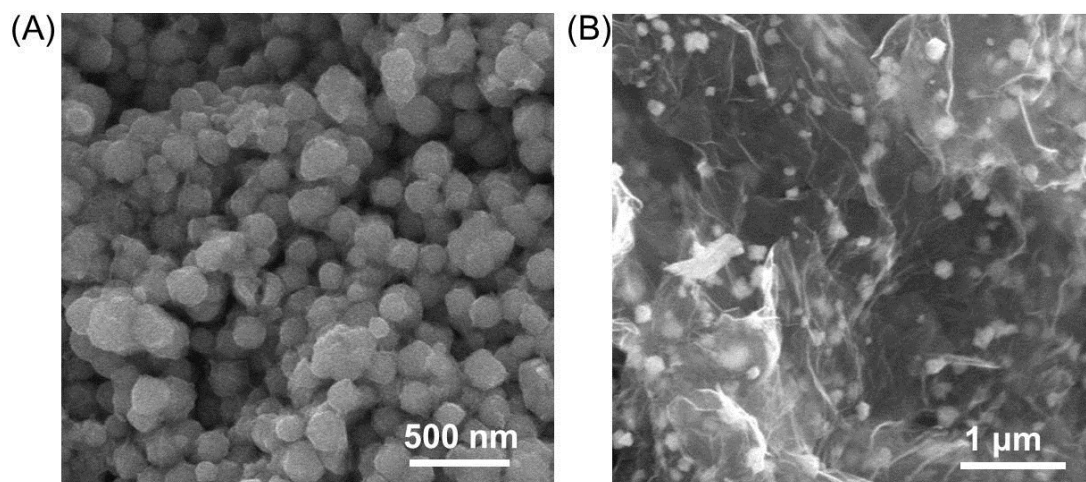

**Figure S6** FESEM images of recycled CoS<sub>2</sub> (A) and CoS<sub>2</sub>/graphene (B) catalysts.

**Table S1.** Hydrogenation of nitrobenzene to aniline on various catalysts.

| Entry            | Catalyst                   | t/h | T/°C | H <sub>2</sub> /MPa | Conv. (%) | Select. (%) | Ref.         |
|------------------|----------------------------|-----|------|---------------------|-----------|-------------|--------------|
| 1 <sup>[a]</sup> | Au/TiO <sub>2</sub> -Con   | 7   | 90   | 1.0                 | 71.1      | 93.1        | [1]          |
| 2 <sup>[b]</sup> | Ru@C <sub>60</sub>         | 48  | 80   | 0.3                 | 100       | 80          | [2]          |
| 3 <sup>[c]</sup> | Co@C                       | 10  | 140  | 1.0                 | 95        | 99          | [3]          |
| 4 <sup>[d]</sup> | FeS <sub>2</sub>           | 6.5 | 90   | 1.0                 | 52.2      | 99          | [4]          |
| 5 <sup>[e]</sup> | CoS <sub>2</sub> /graphene | 1.5 | 30   | 0.25                | 99        | 100         | Present work |

<sup>a</sup> Reaction condition: 40 mg of catalyst, 0.8 mmol nitrobenzene, 3 mL of ethanol solvent, 1.0 MPa of H<sub>2</sub>. <sup>b</sup> Reaction condition: 5 mg of catalyst, 4.06 mmol nitrobenzene, 30 mL of ethanol, 0.3 MPa of H<sub>2</sub>. <sup>c</sup> Reaction condition: 30 mg of catalyst, 0.5 mmol nitrobenzene, 2 mL of toluene solvent, 1.0 MPa of H<sub>2</sub>. <sup>d</sup> Reaction condition: 80 mg of catalyst, 5.0 mmol nitrobenzene, 10 mL of isopropanol, 1.0 MPa of H<sub>2</sub>. <sup>e</sup> Reaction condition: 40 mg of catalyst, 1.0 mmol nitrobenzene, 10 mL of neat ethanol, 0.25 MPa of H<sub>2</sub>. And the reaction was carried out under Xe lamp irradiation (400–800 nm) with light intensity of 0.45 W/cm<sup>2</sup>.

## References

- 1 L. Wang, J. Zhang, H. Wang, Y. Shao, X. H. Liu, Y. Q. Wang, J. P. Lewis and F. S. Xiao, *ACS Catal.* **2016**, *6*, 4110-4116.
- 2 F. Q. Leng, I. C. Gerber, P. Lecante, S. Moldovan, M. Girleanu, M. R. Axet and P. Serp, *ACS Catal.* **2016**, *6*, 6018-6024.
- 3 L. C. Liu, P. Concepción and A. Corma, *J. Catal.* **2016**, *340*, 1-9.
- 4 B. Ma, X. L. Tong, C. X. Guo, X. N. Guo, X. Y. Guo and F. J. Keil, *RSC Adv.* **2016**, *6*, 55220.
